# Supplementary material
Source: Royal Society of Chemistry journal article supplement (doi:10.1039/d6py00281a)
Supplement: d6py00281a1.pdf [file d6py00281a1.pdf]

## Supporting Information

### DL-Methionine-mediated radical-promoted cationic polymerization enabling the polymerization of allyl ethers

Qi Feng,<sup>a</sup> Liyao Shi,<sup>a</sup> Yanhua Zhang,<sup>a</sup> Shilong Liu,<sup>a</sup> Lumin Yang,<sup>a</sup> Junqing Jiang,<sup>a,\*</sup>  
and Yanwu Zhang<sup>a,\*</sup>

<sup>a</sup> School of Chemical Engineering, Zhengzhou University, Zhengzhou 450001, China

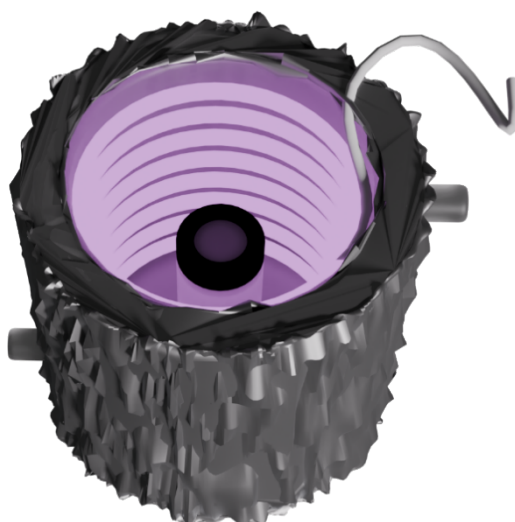

**Fig. S1** Schematic of the reactor setup for photoinduced polymerization.

**Table S1** Additional results of the FRPCP of PEG-AME using HMPP

| Entry | [M]:[Met]:[HMPP]:[DPI] | Solvent     | Conv.(%) | $M_{n,th}/g \cdot mol^{-1}$ | $M_{n,H\ NMR}/g \cdot mol^{-1}$ | $DP$ |
|-------|------------------------|-------------|----------|-----------------------------|---------------------------------|------|
| 1     | 40:1:1:1               | DCM:THF=7:3 | 64.6     | 17700                       | 14500                           | 21.3 |
| 2     | 20:1:0:1               | DCM:THF=7:3 | 0        | 0                           | 0                               | 0    |
| 3     | 20:1:1:1               | DCM:BTF=7:3 | 18.55    | 2700                        | 2500                            | 3.4  |
| 4     | 20:1:1:1               | DCM:DCE=7:3 | 17.93    | 2600                        | 2200                            | 3.0  |

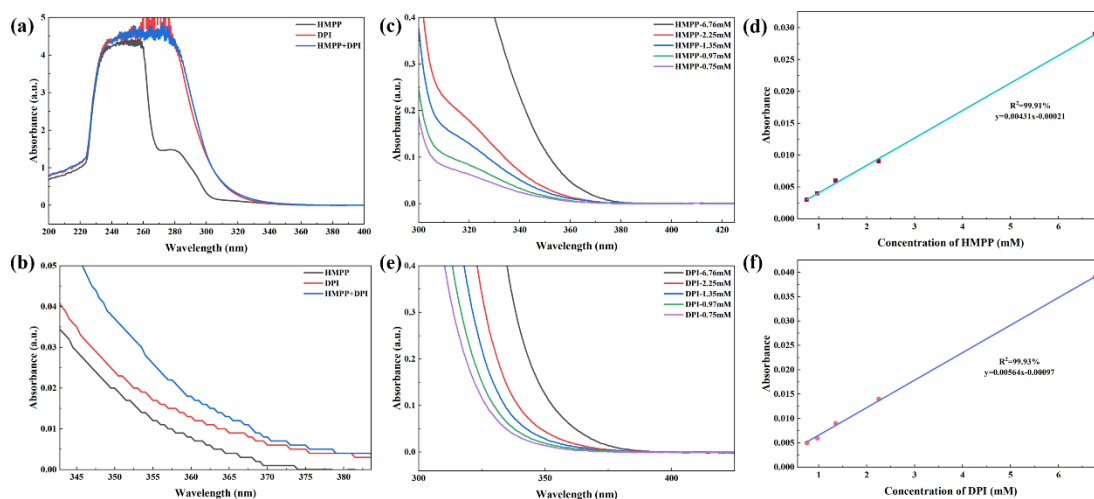

**Fig. S2** (a) UV-vis absorption spectra of HMPP, DPI, and their mixture; (b) enlarged view of the absorption spectra at 365 nm; (c) absorption spectra of HMPP at various concentrations; (d) calibration curve for HMPP concentration versus absorbance; (e) absorption spectra of DPI at various concentrations; (f) calibration curve for DPI concentration versus absorbance.

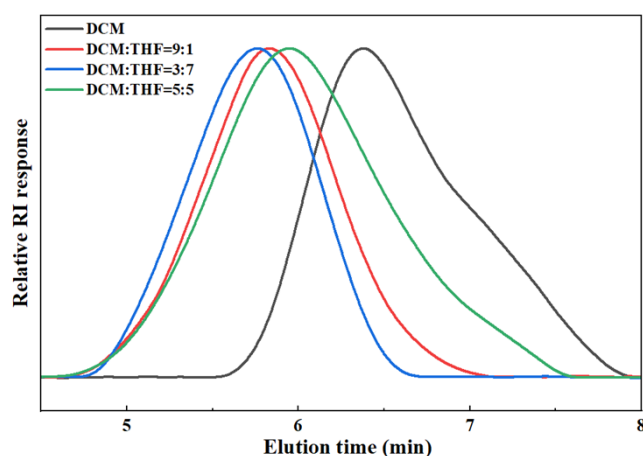

**Fig. S3** GPC curves of P(PEG-AME) via FRPCP at different THF concentrations.

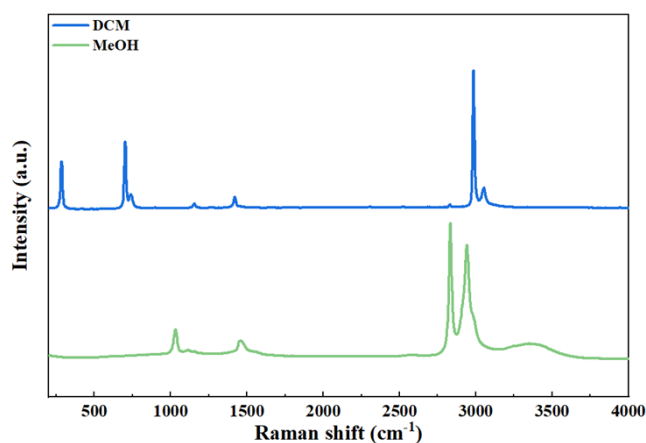

**Fig. S4** Raman spectra of DCM and methanol.

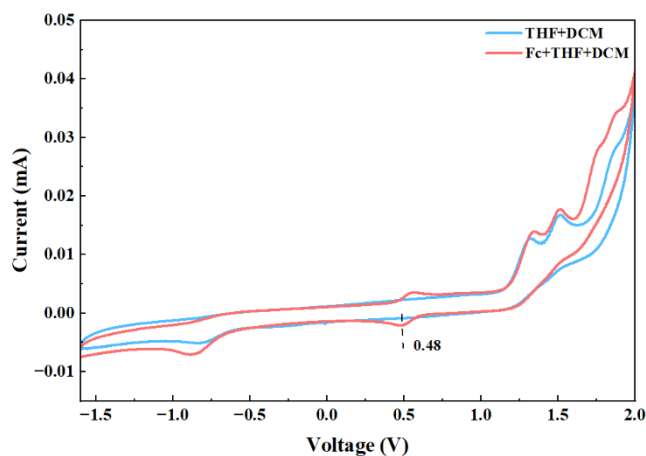

**Fig. S5** Cyclic voltammogram of Fc in DCM:THF = 7:3.

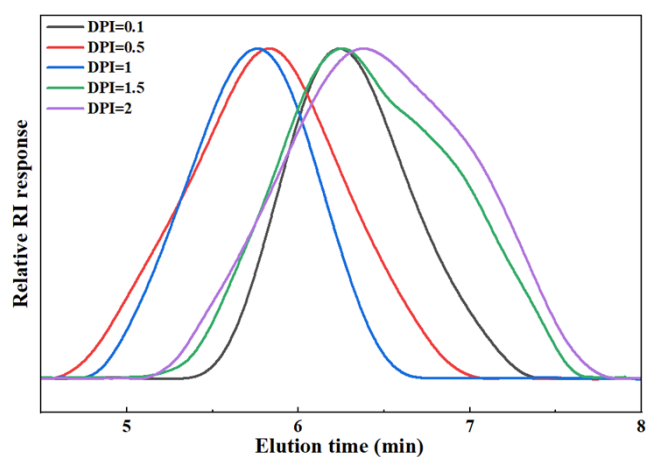

**Fig. S6** GPC curves of P(PEG-AME) via FRPCP at different DPI concentrations.

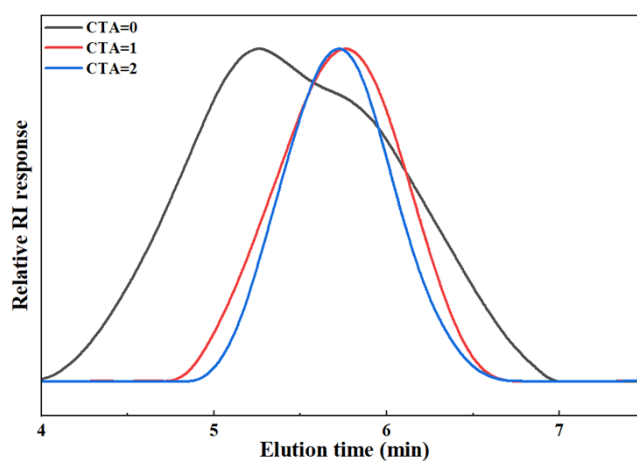

**Fig. S7** GPC curves of P(PEG-AME) via FRPCP at different DL-Met concentrations.

**Table S2** Condensed Fukui function calculation results for DL-methionine

| Atom  | q(N)    | q(N+1)  | q(N-1)  | $f^-$  | $f^+$  | $f^0$  | CDD     |
|-------|---------|---------|---------|--------|--------|--------|---------|
| 1(C)  | -0.0861 | -0.1338 | -0.0413 | 0.0449 | 0.0477 | 0.0463 | 0.0028  |
| 2(H)  | 0.0451  | -0.0163 | 0.0814  | 0.0364 | 0.0614 | 0.0489 | 0.0250  |
| 3(H)  | 0.0346  | -0.0242 | 0.0790  | 0.0443 | 0.0588 | 0.0516 | 0.0145  |
| 4(H)  | 0.0352  | -0.0235 | 0.0792  | 0.0440 | 0.0587 | 0.0514 | 0.0147  |
| 5(C)  | -0.0523 | -0.0580 | -0.0232 | 0.0291 | 0.0058 | 0.0174 | -0.0233 |
| 6(H)  | 0.0328  | 0.0132  | 0.0674  | 0.0346 | 0.0196 | 0.0271 | -0.0150 |
| 7(H)  | 0.0347  | 0.0241  | 0.0619  | 0.0271 | 0.0106 | 0.0189 | -0.0165 |
| 8(C)  | 0.0194  | -0.0045 | 0.0386  | 0.0192 | 0.0239 | 0.0215 | 0.0048  |
| 9(S)  | -0.0447 | -0.1331 | 0.3460  | 0.3907 | 0.0884 | 0.2396 | -0.3023 |
| 10(C) | -0.0510 | -0.0713 | -0.0340 | 0.0170 | 0.0203 | 0.0186 | 0.0033  |
| 11(H) | 0.0335  | -0.0119 | 0.0467  | 0.0131 | 0.0454 | 0.0293 | 0.0323  |
| 12(H) | 0.0326  | 0.0153  | 0.0504  | 0.0178 | 0.0173 | 0.0175 | -0.0006 |
| 13(H) | 0.0373  | 0.0047  | 0.0567  | 0.0194 | 0.0327 | 0.0260 | 0.0133  |
| 14(C) | 0.2024  | 0.0621  | 0.2127  | 0.0103 | 0.1403 | 0.0753 | 0.1300  |
| 15(O) | -0.2850 | -0.4246 | -0.2424 | 0.0426 | 0.1396 | 0.0911 | 0.0970  |
| 16(O) | -0.1651 | -0.2386 | -0.1471 | 0.0180 | 0.0734 | 0.0457 | 0.0554  |
| 17(N) | -0.2001 | -0.2368 | -0.1059 | 0.0941 | 0.0368 | 0.0654 | -0.0574 |
| 18(H) | 0.1795  | 0.1311  | 0.2015  | 0.0221 | 0.0483 | 0.0352 | 0.0263  |
| 19(H) | 0.0987  | 0.0539  | 0.1418  | 0.0431 | 0.0447 | 0.0439 | 0.0016  |
| 20(H) | 0.0984  | 0.0721  | 0.1306  | 0.0321 | 0.0263 | 0.0292 | -0.0059 |

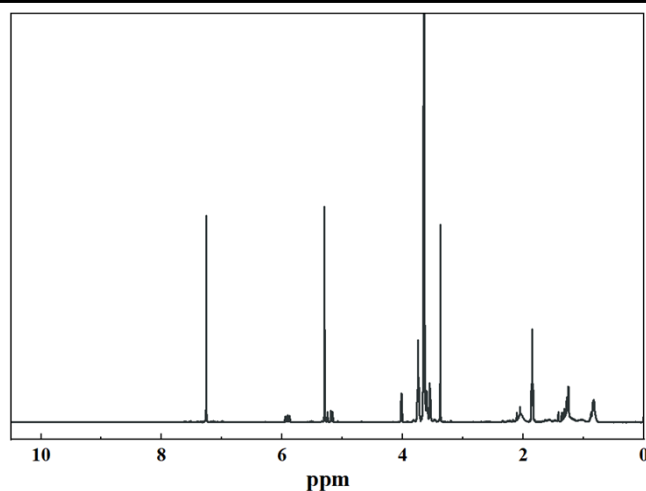**Fig. S8**  $^1\text{H}$  NMR spectrum of the non-quenched P(PEG-AME) product obtained via FRPCP.

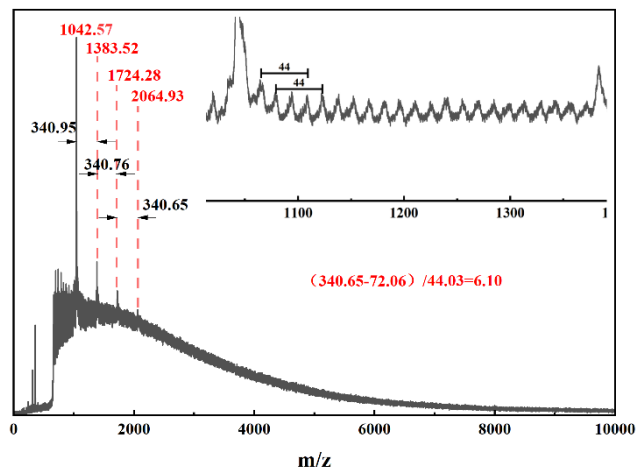

**Fig. S9** Original MALDI-TOF MS of PEG-AME-FRPCP.

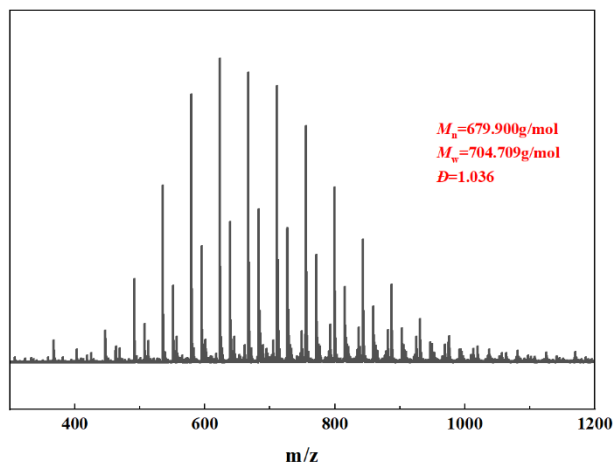

**Fig. S10** MALDI-TOF MS of PEG-AME.

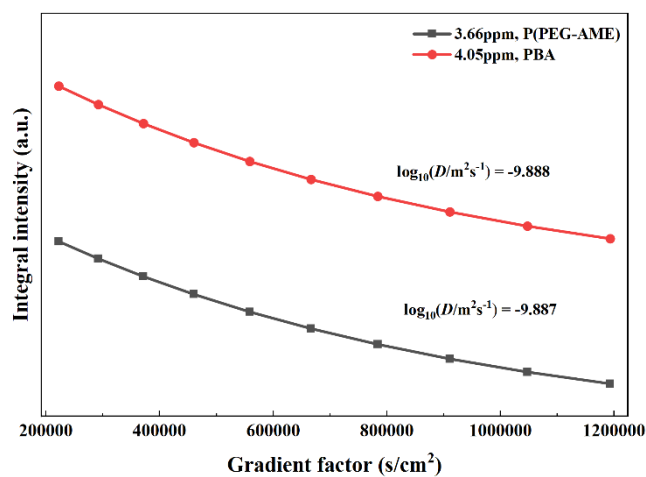

**Fig. S11** Integral attenuation fitting of selected DOSY resonances for PBA-*b*-P(PEG-AME).

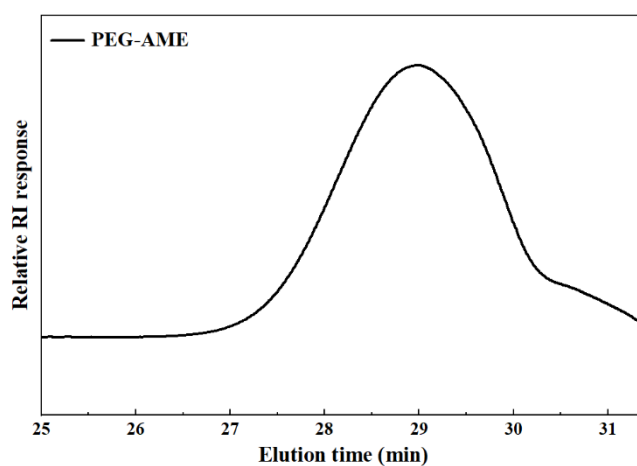

**Fig. S12** GPC curve of the crude block copolymer product without purification.
